# Supplementary material
Source: publisher figshare collection journal article supplement (https://acs.figshare.com/ndownloader/files/5920581)
Supplement: Supplementary file 1 [file 5920581]

## Supporting Information

### Synthesis and Characterisation of A Ultrahigh Ion-Exchange Capacity Polymeric Membranes

Weifeng Zhao<sup>a,b</sup>, Chao He<sup>a</sup>, Chuanxiong Nie<sup>a</sup>, Shudong Sun<sup>a\*</sup>, Changsheng Zhao<sup>a\*</sup>

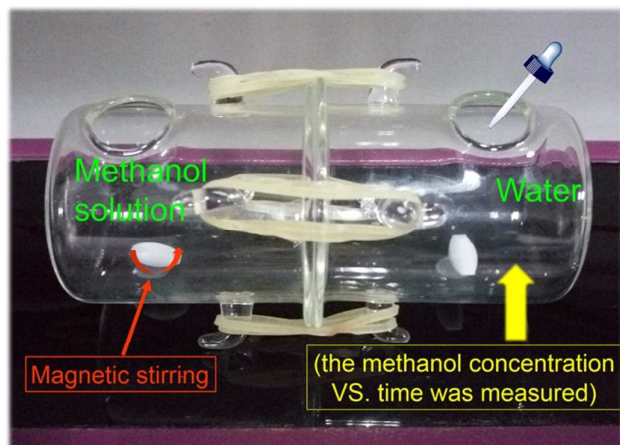

Figure S1. Methanol permeability test cell.

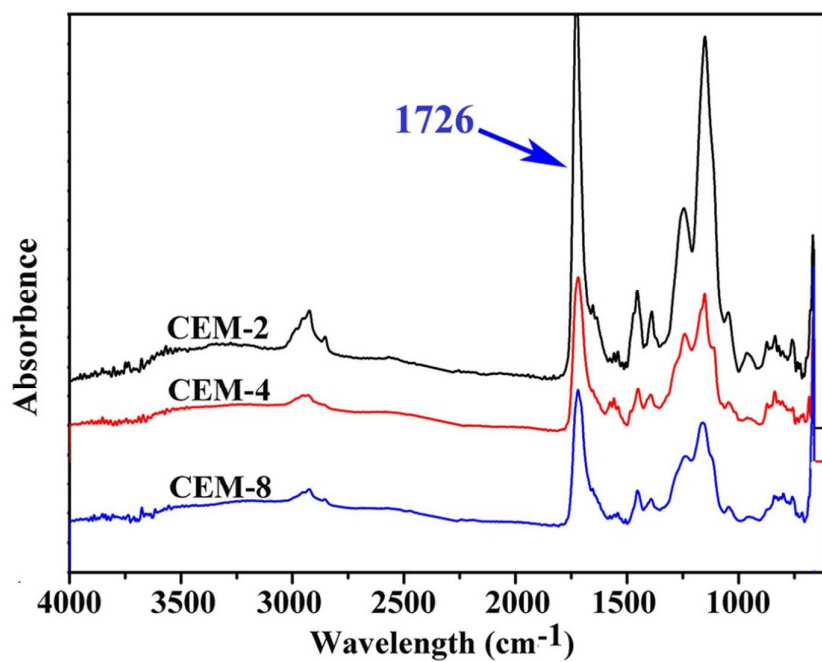

Figure S2. ATR-FTIR of CEMs.

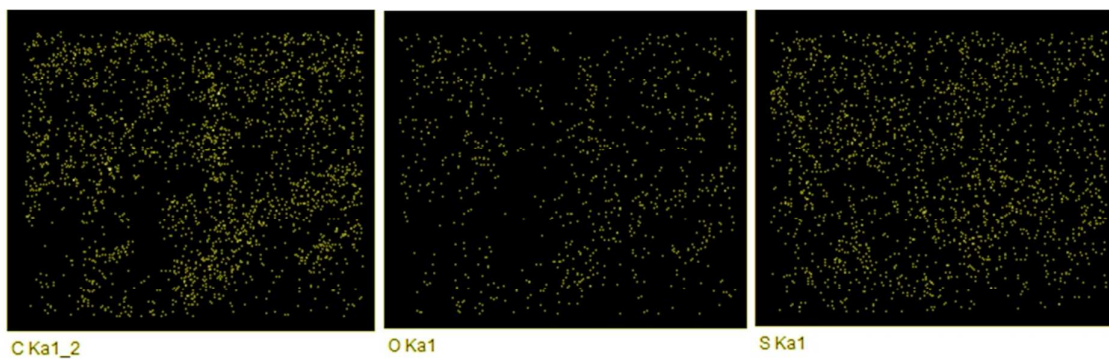

**Figure S3.** 2-dimensional distribution of C, O and S in CEM-2.

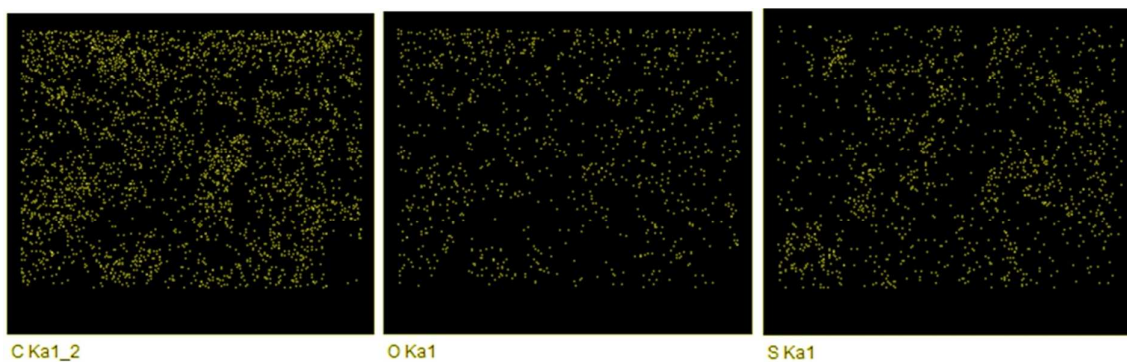

**Figure S4** 2-dimensional distribution of C, O and S in CEM-4.

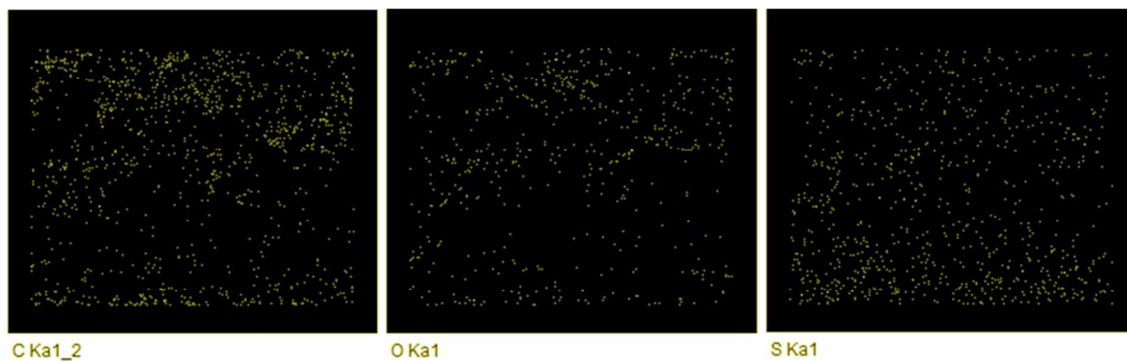

**Figure S5.** 2-dimensional distribution of C, O and S in CEM-8.

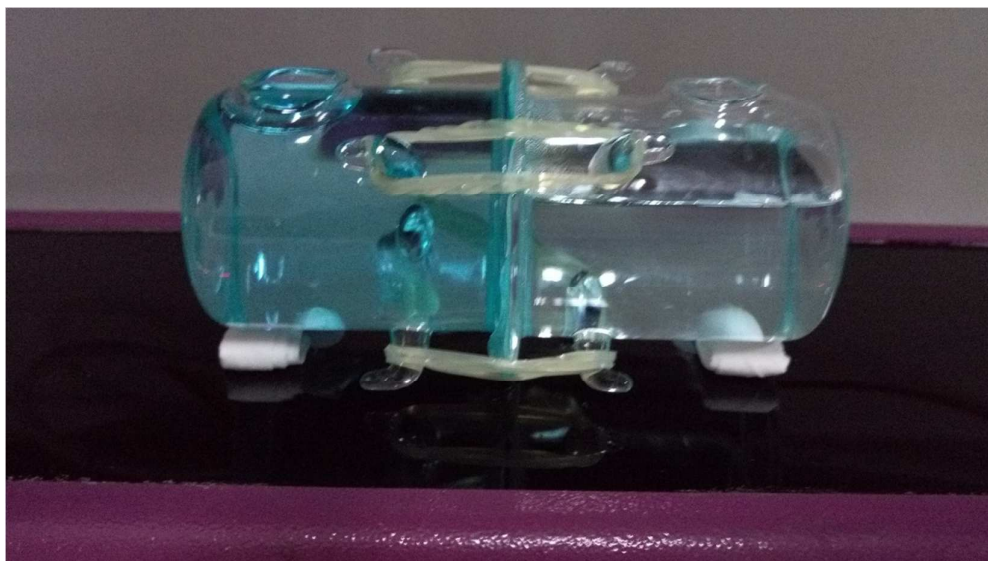

**Figure S6.** The permeability test cells for  $\text{Cu}^{2+}$  after 24 h.

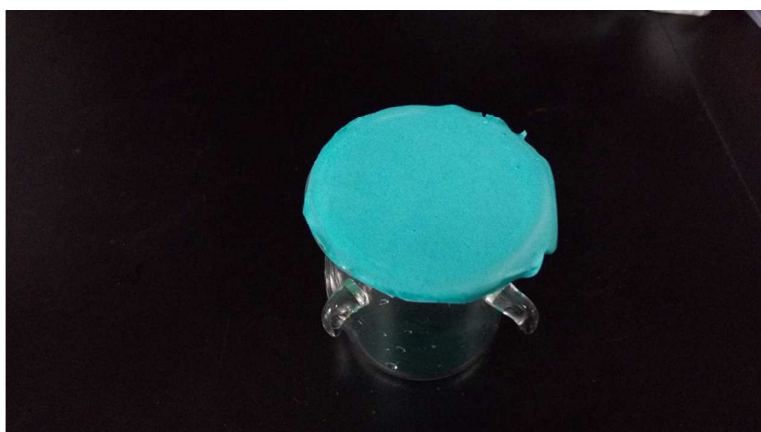

**Figure S7.** The CEM-8 after 24 h of  $\text{Cu}^{2+}$  permeability test.

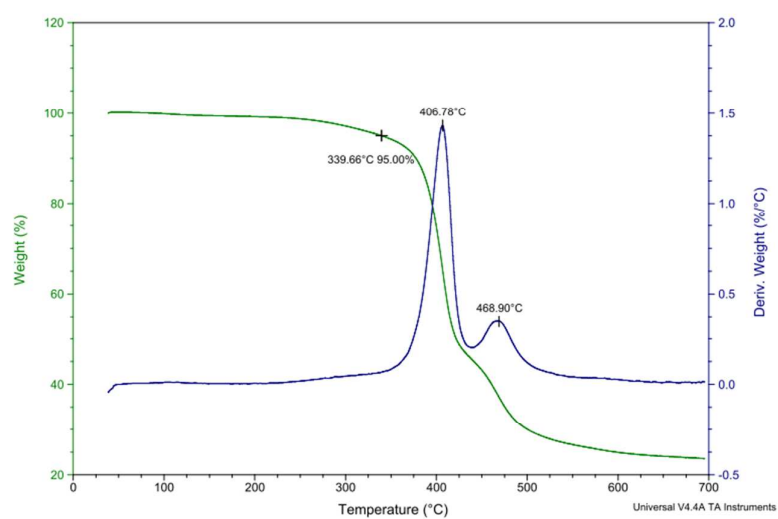

**Figure S8.** TGA and DTG curves for CEM-2.

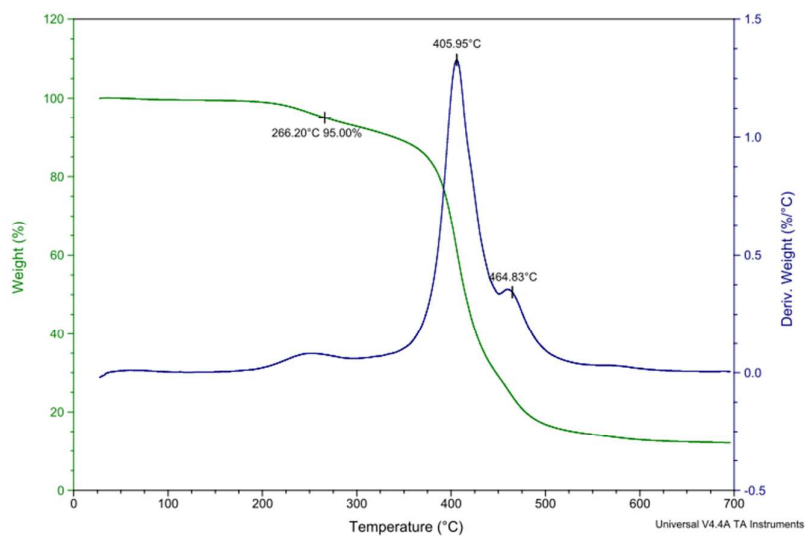

**Figure S9.** TGA and DTG curves for CEM-4.

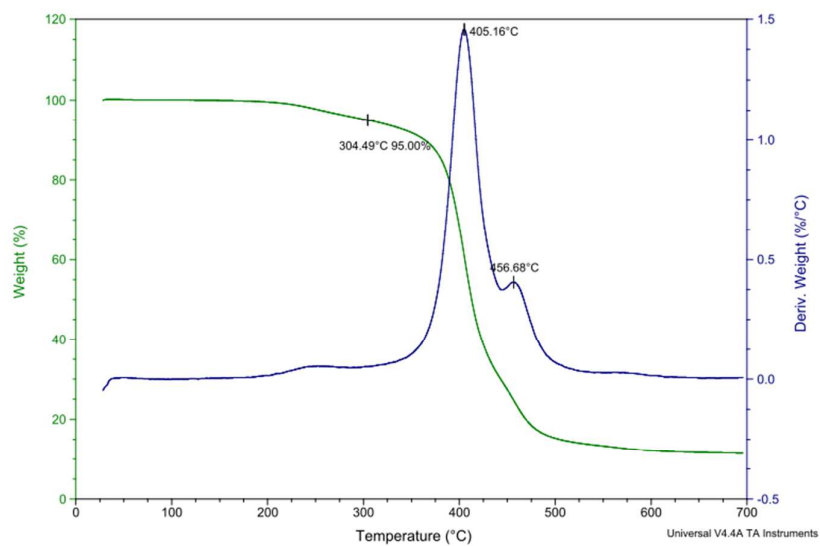

**Figure S10.** TGA and DTG curves for CEM-8.

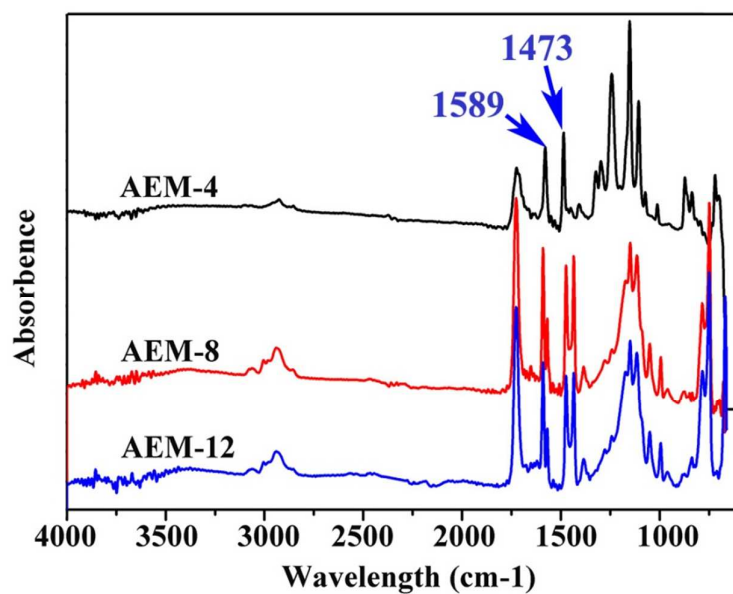

**Figure S11** ATR-FTIR of AEMs.

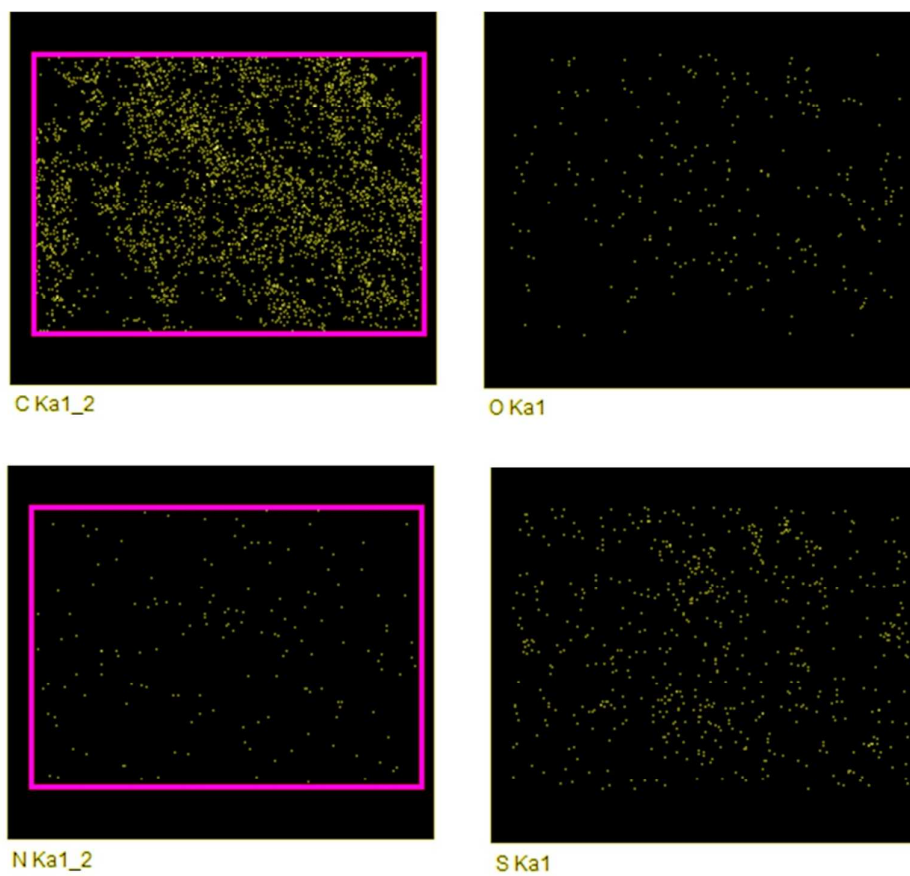

**Figure S12.** 2-demensional distribution of C, O, N and S in AEM-4.



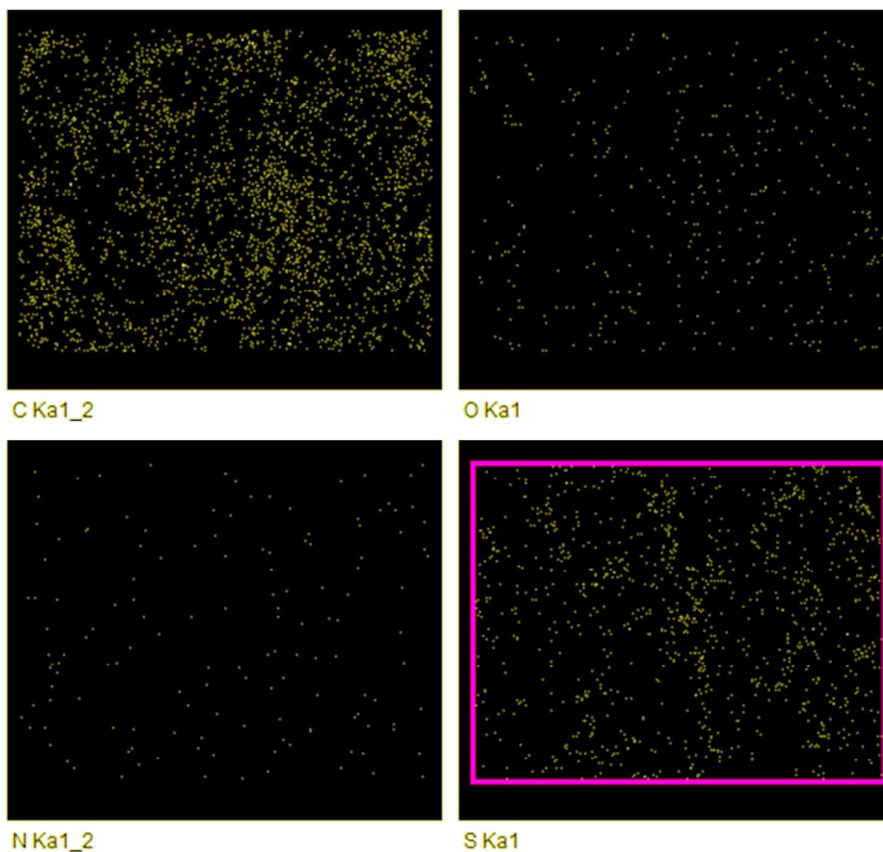

**Figure S13.** 2-dimensional distribution of C, O, N and S in AEM-8.

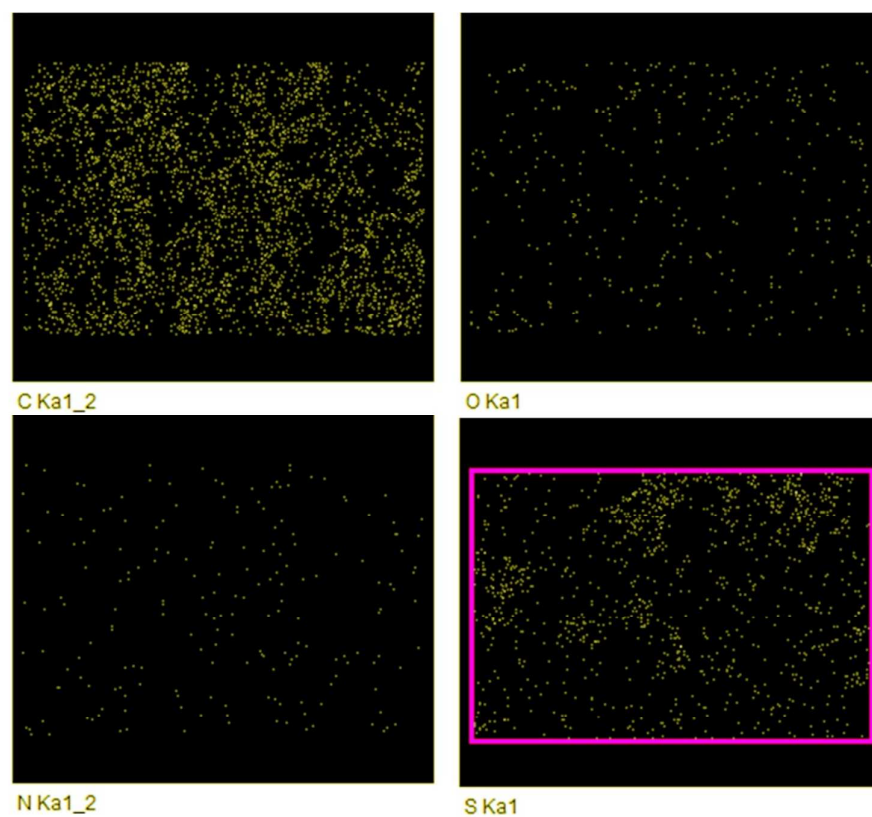

**Figure S14.** 2-dimensional distribution of C, O, N and S in AEM-12.

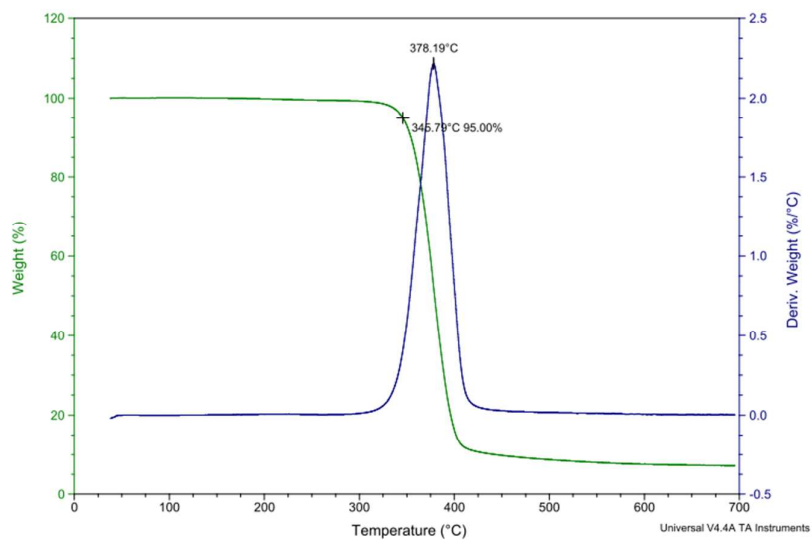

**Figure S15.** TGA and DTG of AEM-4.

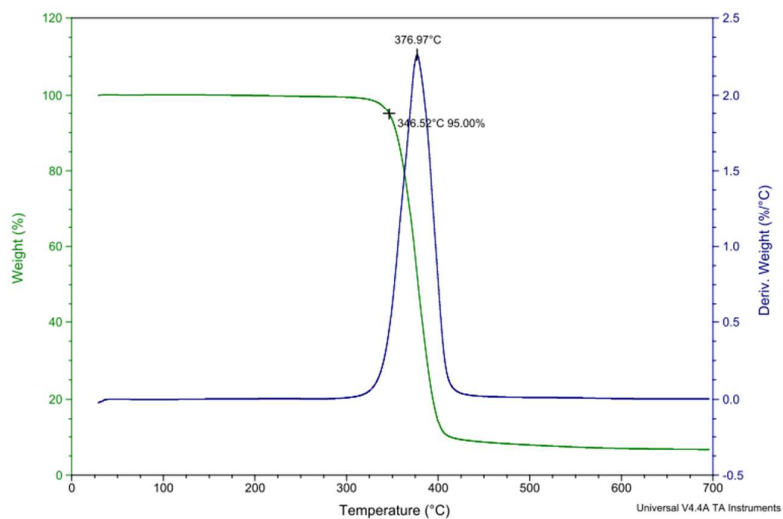

**Figure S16.** TGA and DTG of AEM-8.

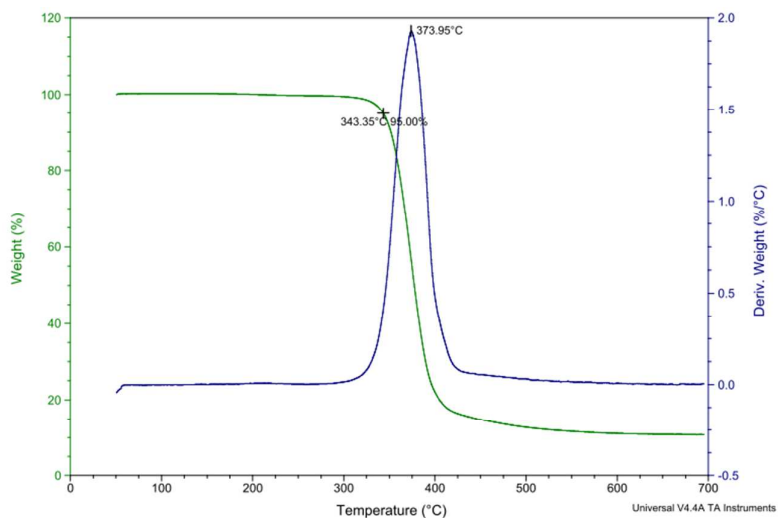

**Figure S17.** TGA and DTG of AEM-12.
